# Supplementary material for: How do world and European standard populations impact burden of disease studies? A case study of disability-adjusted life years (DALYs) in Scotland
Source: Arch Public Health. 2020 Jan 3;78:1. doi: 10.1186/s13690-019-0383-8 (PMC6941317; doi:10.1186/s13690-019-0383-8)
Supplement: Supplementary file 1 — Additional file 1. Dataset containing number and rates of DALYs by cause of disease/injury, Scotland, 2014–16. [file 13690_2019_383_MOESM1_ESM.csv]

Cause	Method	Value
Ischaemic heart disease	Age-standardised rate of DALYs per 100,000 (ESP2013)	1805.291449
Lower back and neck pain	Age-standardised rate of DALYs per 100,000 (ESP2013)	1270.157795
Depression	Age-standardised rate of DALYs per 100,000 (ESP2013)	1243.390268
Cerebrovascular disease	Age-standardised rate of DALYs per 100,000 (ESP2013)	1102.589369
Tracheal, bronchus, and lung cancer	Age-standardised rate of DALYs per 100,000 (ESP2013)	1093.439562
Alzheimer's disease and other dementias	Age-standardised rate of DALYs per 100,000 (ESP2013)	994.8907014
Chronic obstructive pulmonary disease	Age-standardised rate of DALYs per 100,000 (ESP2013)	919.0597469
Drug use disorders	Age-standardised rate of DALYs per 100,000 (ESP2013)	897.7830131
Migraine	Age-standardised rate of DALYs per 100,000 (ESP2013)	884.6904413
Anxiety disorders	Age-standardised rate of DALYs per 100,000 (ESP2013)	852.9675294
Sensory conditions	Age-standardised rate of DALYs per 100,000 (ESP2013)	814.965122
Other cancers	Age-standardised rate of DALYs per 100,000 (ESP2013)	798.7827325
Other cardiovascular and circulatory diseases	Age-standardised rate of DALYs per 100,000 (ESP2013)	655.6755206
Diabetes mellitus	Age-standardised rate of DALYs per 100,000 (ESP2013)	584.6917603
Alcohol dependence	Age-standardised rate of DALYs per 100,000 (ESP2013)	536.2266419
Suicide and injuries from self-harm and interpersonal violence	Age-standardised rate of DALYs per 100,000 (ESP2013)	519.7857749
Cirrhosis and other chronic liver diseases	Age-standardised rate of DALYs per 100,000 (ESP2013)	509.8677002
Colon and rectum cancer	Age-standardised rate of DALYs per 100,000 (ESP2013)	479.7488706
Breast cancer	Age-standardised rate of DALYs per 100,000 (ESP2013)	439.7388656
Lower respiratory infections	Age-standardised rate of DALYs per 100,000 (ESP2013)	436.3531808
Other musculoskeletal disorders	Age-standardised rate of DALYs per 100,000 (ESP2013)	391.9414301
Osteoarthritis	Age-standardised rate of DALYs per 100,000 (ESP2013)	389.3747847
Skin and subcutaneous diseases	Age-standardised rate of DALYs per 100,000 (ESP2013)	329.6930233
Other digestive diseases	Age-standardised rate of DALYs per 100,000 (ESP2013)	299.9586031
Asthma	Age-standardised rate of DALYs per 100,000 (ESP2013)	293.9766371
Falls	Age-standardised rate of DALYs per 100,000 (ESP2013)	283.3212771
Atrial fibrillation and flutter	Age-standardised rate of DALYs per 100,000 (ESP2013)	278.6248217
Chronic kidney disease	Age-standardised rate of DALYs per 100,000 (ESP2013)	273.3054361
Congenital birth defects	Age-standardised rate of DALYs per 100,000 (ESP2013)	269.3882808
Other endocrine, metabolic, blood, and immune disorders	Age-standardised rate of DALYs per 100,000 (ESP2013)	254.199253
Epilepsy	Age-standardised rate of DALYs per 100,000 (ESP2013)	244.1616637
Oesophageal cancer	Age-standardised rate of DALYs per 100,000 (ESP2013)	226.0142462
Schizophrenia	Age-standardised rate of DALYs per 100,000 (ESP2013)	224.0924934
Prostate cancer	Age-standardised rate of DALYs per 100,000 (ESP2013)	215.9516739
Dental health disorders	Age-standardised rate of DALYs per 100,000 (ESP2013)	203.3633257
Pancreatic cancer	Age-standardised rate of DALYs per 100,000 (ESP2013)	195.4718063
Other unintentional injuries	Age-standardised rate of DALYs per 100,000 (ESP2013)	191.6416851
Gynecological diseases	Age-standardised rate of DALYs per 100,000 (ESP2013)	190.8379775
Rheumatoid arthritis	Age-standardised rate of DALYs per 100,000 (ESP2013)	179.9318088
Other mental and substance use disorders	Age-standardised rate of DALYs per 100,000 (ESP2013)	174.6357272
Urinary diseases and male infertility	Age-standardised rate of DALYs per 100,000 (ESP2013)	169.9655212
Other chronic respiratory diseases	Age-standardised rate of DALYs per 100,000 (ESP2013)	168.2392519
Transport injuries	Age-standardised rate of DALYs per 100,000 (ESP2013)	151.5770136
Liver cancer	Age-standardised rate of DALYs per 100,000 (ESP2013)	149.5778984
Other neurological disorders	Age-standardised rate of DALYs per 100,000 (ESP2013)	145.7118742
Non-Hodgkin's lymphoma	Age-standardised rate of DALYs per 100,000 (ESP2013)	143.1057273
Diarrhoea and other common infections	Age-standardised rate of DALYs per 100,000 (ESP2013)	125.8614553
Bladder cancer	Age-standardised rate of DALYs per 100,000 (ESP2013)	121.231489
Kidney cancer	Age-standardised rate of DALYs per 100,000 (ESP2013)	120.0544746
Neonatal disorders	Age-standardised rate of DALYs per 100,000 (ESP2013)	119.8698131
Multiple sclerosis	Age-standardised rate of DALYs per 100,000 (ESP2013)	119.523978
Stomach cancer	Age-standardised rate of DALYs per 100,000 (ESP2013)	117.8371658
Ovarian cancer	Age-standardised rate of DALYs per 100,000 (ESP2013)	116.0782207
Inflammatory bowel disease	Age-standardised rate of DALYs per 100,000 (ESP2013)	113.3715639
Gallbladder and biliary diseases	Age-standardised rate of DALYs per 100,000 (ESP2013)	108.9522523
Leukaemia	Age-standardised rate of DALYs per 100,000 (ESP2013)	107.3258788
Parkinson's disease	Age-standardised rate of DALYs per 100,000 (ESP2013)	105.1041627
Tension-type headache	Age-standardised rate of DALYs per 100,000 (ESP2013)	97.81241347
Nutritional deficiencies	Age-standardised rate of DALYs per 100,000 (ESP2013)	80.41290931
Pancreatitis	Age-standardised rate of DALYs per 100,000 (ESP2013)	74.09326096
Peripheral vascular disease	Age-standardised rate of DALYs per 100,000 (ESP2013)	66.91402072
Multiple myeloma	Age-standardised rate of DALYs per 100,000 (ESP2013)	66.41971802
Peptic ulcer disease	Age-standardised rate of DALYs per 100,000 (ESP2013)	65.22519653
Unknown and other causes of injury	Age-standardised rate of DALYs per 100,000 (ESP2013)	59.12543501
HIV/AIDS and tuberculosis	Age-standardised rate of DALYs per 100,000 (ESP2013)	27.48557783
Other communicable, maternal, neonatal, and nutritional diseases	Age-standardised rate of DALYs per 100,000 (ESP2013)	23.18753119
Sudden infant death syndrome	Age-standardised rate of DALYs per 100,000 (ESP2013)	22.72783398
Maternal disorders	Age-standardised rate of DALYs per 100,000 (ESP2013)	16.62553767
Ischaemic heart disease	Age-standardised rate of DALYs per 100,000 (GBD WSP)	1058.639495
Lower back and neck pain	Age-standardised rate of DALYs per 100,000 (GBD WSP)	1070.096991
Depression	Age-standardised rate of DALYs per 100,000 (GBD WSP)	1057.978838
Cerebrovascular disease	Age-standardised rate of DALYs per 100,000 (GBD WSP)	609.5036103
Tracheal, bronchus, and lung cancer	Age-standardised rate of DALYs per 100,000 (GBD WSP)	648.9193568
Alzheimer's disease and other dementias	Age-standardised rate of DALYs per 100,000 (GBD WSP)	456.2765434
Chronic obstructive pulmonary disease	Age-standardised rate of DALYs per 100,000 (GBD WSP)	523.2577948
Drug use disorders	Age-standardised rate of DALYs per 100,000 (GBD WSP)	916.2247729
Migraine	Age-standardised rate of DALYs per 100,000 (GBD WSP)	862.6754825
Anxiety disorders	Age-standardised rate of DALYs per 100,000 (GBD WSP)	716.3385814
Sensory conditions	Age-standardised rate of DALYs per 100,000 (GBD WSP)	676.02606
Other cancers	Age-standardised rate of DALYs per 100,000 (GBD WSP)	555.124006
Other cardiovascular and circulatory diseases	Age-standardised rate of DALYs per 100,000 (GBD WSP)	416.6353955
Diabetes mellitus	Age-standardised rate of DALYs per 100,000 (GBD WSP)	380.1846803
Alcohol dependence	Age-standardised rate of DALYs per 100,000 (GBD WSP)	433.6775975
Suicide and injuries from self-harm and interpersonal violence	Age-standardised rate of DALYs per 100,000 (GBD WSP)	516.3306579
Cirrhosis and other chronic liver diseases	Age-standardised rate of DALYs per 100,000 (GBD WSP)	384.4450242
Colon and rectum cancer	Age-standardised rate of DALYs per 100,000 (GBD WSP)	295.7113609
Breast cancer	Age-standardised rate of DALYs per 100,000 (GBD WSP)	297.8187394
Lower respiratory infections	Age-standardised rate of DALYs per 100,000 (GBD WSP)	261.3014175
Other musculoskeletal disorders	Age-standardised rate of DALYs per 100,000 (GBD WSP)	319.403256
Osteoarthritis	Age-standardised rate of DALYs per 100,000 (GBD WSP)	245.9278428
Skin and subcutaneous diseases	Age-standardised rate of DALYs per 100,000 (GBD WSP)	340.6051241
Other digestive diseases	Age-standardised rate of DALYs per 100,000 (GBD WSP)	179.5532185
Asthma	Age-standardised rate of DALYs per 100,000 (GBD WSP)	311.1799745
Falls	Age-standardised rate of DALYs per 100,000 (GBD WSP)	188.4903099
Atrial fibrillation and flutter	Age-standardised rate of DALYs per 100,000 (GBD WSP)	141.2049902
Chronic kidney disease	Age-standardised rate of DALYs per 100,000 (GBD WSP)	149.1500368
Congenital birth defects	Age-standardised rate of DALYs per 100,000 (GBD WSP)	362.7779314
Other endocrine, metabolic, blood, and immune disorders	Age-standardised rate of DALYs per 100,000 (GBD WSP)	197.2197934
Epilepsy	Age-standardised rate of DALYs per 100,000 (GBD WSP)	220.2585043
Oesophageal cancer	Age-standardised rate of DALYs per 100,000 (GBD WSP)	137.5352946
Schizophrenia	Age-standardised rate of DALYs per 100,000 (GBD WSP)	185.8496395
Prostate cancer	Age-standardised rate of DALYs per 100,000 (GBD WSP)	115.0941617
Dental health disorders	Age-standardised rate of DALYs per 100,000 (GBD WSP)	129.7593899
Pancreatic cancer	Age-standardised rate of DALYs per 100,000 (GBD WSP)	117.6203165
Other unintentional injuries	Age-standardised rate of DALYs per 100,000 (GBD WSP)	180.0461698
Gynecological diseases	Age-standardised rate of DALYs per 100,000 (GBD WSP)	187.4688997
Rheumatoid arthritis	Age-standardised rate of DALYs per 100,000 (GBD WSP)	123.8762801
Other mental and substance use disorders	Age-standardised rate of DALYs per 100,000 (GBD WSP)	175.7012253
Urinary diseases and male infertility	Age-standardised rate of DALYs per 100,000 (GBD WSP)	95.64869761
Other chronic respiratory diseases	Age-standardised rate of DALYs per 100,000 (GBD WSP)	94.85060493
Transport injuries	Age-standardised rate of DALYs per 100,000 (GBD WSP)	160.7538373
Liver cancer	Age-standardised rate of DALYs per 100,000 (GBD WSP)	90.86464492
Other neurological disorders	Age-standardised rate of DALYs per 100,000 (GBD WSP)	108.2336561
Non-Hodgkin's lymphoma	Age-standardised rate of DALYs per 100,000 (GBD WSP)	88.65423435
Diarrhoea and other common infections	Age-standardised rate of DALYs per 100,000 (GBD WSP)	128.1989076
Bladder cancer	Age-standardised rate of DALYs per 100,000 (GBD WSP)	68.36744322
Kidney cancer	Age-standardised rate of DALYs per 100,000 (GBD WSP)	77.42015505
Neonatal disorders	Age-standardised rate of DALYs per 100,000 (GBD WSP)	217.8311386
Multiple sclerosis	Age-standardised rate of DALYs per 100,000 (GBD WSP)	86.91689054
Stomach cancer	Age-standardised rate of DALYs per 100,000 (GBD WSP)	72.95130732
Ovarian cancer	Age-standardised rate of DALYs per 100,000 (GBD WSP)	73.20034035
Inflammatory bowel disease	Age-standardised rate of DALYs per 100,000 (GBD WSP)	89.35778566
Gallbladder and biliary diseases	Age-standardised rate of DALYs per 100,000 (GBD WSP)	70.64262665
Leukaemia	Age-standardised rate of DALYs per 100,000 (GBD WSP)	71.60993584
Parkinson's disease	Age-standardised rate of DALYs per 100,000 (GBD WSP)	53.67016103
Tension-type headache	Age-standardised rate of DALYs per 100,000 (GBD WSP)	96.04810081
Nutritional deficiencies	Age-standardised rate of DALYs per 100,000 (GBD WSP)	62.47234888
Pancreatitis	Age-standardised rate of DALYs per 100,000 (GBD WSP)	53.74118591
Peripheral vascular disease	Age-standardised rate of DALYs per 100,000 (GBD WSP)	35.22317159
Multiple myeloma	Age-standardised rate of DALYs per 100,000 (GBD WSP)	38.03288714
Peptic ulcer disease	Age-standardised rate of DALYs per 100,000 (GBD WSP)	39.22768425
Unknown and other causes of injury	Age-standardised rate of DALYs per 100,000 (GBD WSP)	53.35426327
HIV/AIDS and tuberculosis	Age-standardised rate of DALYs per 100,000 (GBD WSP)	22.82319973
Other communicable, maternal, neonatal, and nutritional diseases	Age-standardised rate of DALYs per 100,000 (GBD WSP)	17.76049209
Sudden infant death syndrome	Age-standardised rate of DALYs per 100,000 (GBD WSP)	41.57863888
Maternal disorders	Age-standardised rate of DALYs per 100,000 (GBD WSP)	19.75339477
Ischaemic heart disease	Number of DALYs	93740.32521
Lower back and neck pain	Number of DALYs	67850.33745
Depression	Number of DALYs	67091.9456
Tracheal, bronchus, and lung cancer	Number of DALYs	57384.58704
Cerebrovascular disease	Number of DALYs	56268.79411
Alzheimer's disease and other dementias	Number of DALYs	48959.26009
Migraine	Number of DALYs	48001.36618
Drug use disorders	Number of DALYs	47976.53449
Chronic obstructive pulmonary disease	Number of DALYs	47574.43267
Anxiety disorders	Number of DALYs	46037.00638
Sensory conditions	Number of DALYs	43193.82903
Other cancers	Number of DALYs	42295.87971
Other cardiovascular and circulatory diseases	Number of DALYs	34039.3065
Diabetes mellitus	Number of DALYs	30781.82454
Alcohol dependence	Number of DALYs	28881.9277
Suicide and injuries from self-harm and interpersonal violence	Number of DALYs	28242.82738
Cirrhosis and other chronic liver diseases	Number of DALYs	27516.72428
Colon and rectum cancer	Number of DALYs	25168.24385
Breast cancer	Number of DALYs	23286.2013
Lower respiratory infections	Number of DALYs	22166.22954
Other musculoskeletal disorders	Number of DALYs	20847.32787
Osteoarthritis	Number of DALYs	20663.11907
Skin and subcutaneous diseases	Number of DALYs	17748.50237
Asthma	Number of DALYs	15801.38877
Other digestive diseases	Number of DALYs	15558.54079
Congenital birth defects	Number of DALYs	14909.0007
Falls	Number of DALYs	14576.78223
Atrial fibrillation and flutter	Number of DALYs	14012.47569
Chronic kidney disease	Number of DALYs	13908.79542
Other endocrine, metabolic, blood, and immune disorders	Number of DALYs	13516.69148
Epilepsy	Number of DALYs	13122.11413
Schizophrenia	Number of DALYs	11969.69833
Oesophageal cancer	Number of DALYs	11934.9905
Prostate cancer	Number of DALYs	11072.08312
Dental health disorders	Number of DALYs	10605.49414
Gynecological diseases	Number of DALYs	10396.78665
Other unintentional injuries	Number of DALYs	10295.67752
Pancreatic cancer	Number of DALYs	10291.61388
Rheumatoid arthritis	Number of DALYs	9536.511046
Other mental and substance use disorders	Number of DALYs	9334.552292
Urinary diseases and male infertility	Number of DALYs	8761.056212
Other chronic respiratory diseases	Number of DALYs	8689.125098
Transport injuries	Number of DALYs	8343.628409
Liver cancer	Number of DALYs	7911.334871
Other neurological disorders	Number of DALYs	7804.375112
Non-Hodgkin's lymphoma	Number of DALYs	7477.642426
Neonatal disorders	Number of DALYs	6871.370188
Diarrhoea and other common infections	Number of DALYs	6750.578986
Multiple sclerosis	Number of DALYs	6443.800838
Kidney cancer	Number of DALYs	6337.132713
Bladder cancer	Number of DALYs	6236.413359
Stomach cancer	Number of DALYs	6180.07408
Ovarian cancer	Number of DALYs	6163.15013
Inflammatory bowel disease	Number of DALYs	6066.102196
Gallbladder and biliary diseases	Number of DALYs	5680.292341
Leukaemia	Number of DALYs	5601.604102
Parkinson's disease	Number of DALYs	5327.230836
Tension-type headache	Number of DALYs	5310.966289
Nutritional deficiencies	Number of DALYs	4221.269067
Pancreatitis	Number of DALYs	3929.011007
Multiple myeloma	Number of DALYs	3460.41586
Peptic ulcer disease	Number of DALYs	3392.323433
Peripheral vascular disease	Number of DALYs	3387.966702
Unknown and other causes of injury	Number of DALYs	3169.288362
HIV/AIDS and tuberculosis	Number of DALYs	1459.7946
Sudden infant death syndrome	Number of DALYs	1305.659515
Other communicable, maternal, neonatal, and nutritional diseases	Number of DALYs	1232.076384
Maternal disorders	Number of DALYs	930.6119834
Ischaemic heart disease	Crude rates of DALYs per 100,000 population	1743.973604
Lower back and neck pain	Crude rates of DALYs per 100,000 population	1262.30814
Depression	Crude rates of DALYs per 100,000 population	1248.198557
Tracheal, bronchus, and lung cancer	Crude rates of DALYs per 100,000 population	1067.599766
Cerebrovascular disease	Crude rates of DALYs per 100,000 population	1046.841031
Alzheimer's disease and other dementias	Crude rates of DALYs per 100,000 population	910.8521618
Migraine	Crude rates of DALYs per 100,000 population	893.0310617
Drug use disorders	Crude rates of DALYs per 100,000 population	892.5689198
Chronic obstructive pulmonary disease	Crude rates of DALYs per 100,000 population	885.08794
Anxiety disorders	Crude rates of DALYs per 100,000 population	856.4850756
Sensory conditions	Crude rates of DALYs per 100,000 population	803.5896759
Other cancers	Crude rates of DALYs per 100,000 population	786.8838376
Other cardiovascular and circulatory diseases	Crude rates of DALYs per 100,000 population	633.2762275
Diabetes mellitus	Crude rates of DALYs per 100,000 population	572.6730683
Alcohol dependence	Crude rates of DALYs per 100,000 population	537.3267934
Suicide and injuries from self-harm and interpersonal violence	Crude rates of DALYs per 100,000 population	525.4367094
Cirrhosis and other chronic liver diseases	Crude rates of DALYs per 100,000 population	511.9280083
Colon and rectum cancer	Crude rates of DALYs per 100,000 population	468.2362049
Breast cancer	Crude rates of DALYs per 100,000 population	433.2221414
Lower respiratory infections	Crude rates of DALYs per 100,000 population	412.3858382
Other musculoskeletal disorders	Crude rates of DALYs per 100,000 population	387.8486038
Osteoarthritis	Crude rates of DALYs per 100,000 population	384.4214683
Skin and subcutaneous diseases	Crude rates of DALYs per 100,000 population	330.1972005
Asthma	Crude rates of DALYs per 100,000 population	293.9725988
Other digestive diseases	Crude rates of DALYs per 100,000 population	289.4545464
Congenital birth defects	Crude rates of DALYs per 100,000 population	277.3703067
Falls	Crude rates of DALYs per 100,000 population	271.1895913
Atrial fibrillation and flutter	Crude rates of DALYs per 100,000 population	260.6910626
Chronic kidney disease	Crude rates of DALYs per 100,000 population	258.7621247
Other endocrine, metabolic, blood, and immune disorders	Crude rates of DALYs per 100,000 population	251.4672946
Epilepsy	Crude rates of DALYs per 100,000 population	244.1264515
Schizophrenia	Crude rates of DALYs per 100,000 population	222.6866346
Oesophageal cancer	Crude rates of DALYs per 100,000 population	222.040882
Prostate cancer	Crude rates of DALYs per 100,000 population	205.9871471
Dental health disorders	Crude rates of DALYs per 100,000 population	197.3066
Gynecological diseases	Crude rates of DALYs per 100,000 population	193.4237308
Other unintentional injuries	Crude rates of DALYs per 100,000 population	191.5426423
Pancreatic cancer	Crude rates of DALYs per 100,000 population	191.467006
Rheumatoid arthritis	Crude rates of DALYs per 100,000 population	177.4189062
Other mental and substance use disorders	Crude rates of DALYs per 100,000 population	173.6615982
Urinary diseases and male infertility	Crude rates of DALYs per 100,000 population	162.9921493
Other chronic respiratory diseases	Crude rates of DALYs per 100,000 population	161.6539008
Transport injuries	Crude rates of DALYs per 100,000 population	155.2261951
Liver cancer	Crude rates of DALYs per 100,000 population	147.1837097
Other neurological disorders	Crude rates of DALYs per 100,000 population	145.1937867
Non-Hodgkin's lymphoma	Crude rates of DALYs per 100,000 population	139.115176
Neonatal disorders	Crude rates of DALYs per 100,000 population	127.835973
Diarrhoea and other common infections	Crude rates of DALYs per 100,000 population	125.5887325
Multiple sclerosis	Crude rates of DALYs per 100,000 population	119.8813658
Kidney cancer	Crude rates of DALYs per 100,000 population	117.8968753
Bladder cancer	Crude rates of DALYs per 100,000 population	116.0230572
Stomach cancer	Crude rates of DALYs per 100,000 population	114.9748924
Ovarian cancer	Crude rates of DALYs per 100,000 population	114.6600158
Inflammatory bowel disease	Crude rates of DALYs per 100,000 population	112.8545029
Gallbladder and biliary diseases	Crude rates of DALYs per 100,000 population	105.6768297
Leukaemia	Crude rates of DALYs per 100,000 population	104.2128851
Parkinson's disease	Crude rates of DALYs per 100,000 population	99.10839492
Tension-type headache	Crude rates of DALYs per 100,000 population	98.8057891
Nutritional deficiencies	Crude rates of DALYs per 100,000 population	78.53292995
Pancreatitis	Crude rates of DALYs per 100,000 population	73.09571693
Multiple myeloma	Crude rates of DALYs per 100,000 population	64.37791359
Peptic ulcer disease	Crude rates of DALYs per 100,000 population	63.1111037
Peripheral vascular disease	Crude rates of DALYs per 100,000 population	63.03003895
Unknown and other causes of injury	Crude rates of DALYs per 100,000 population	58.96171636
HIV/AIDS and tuberculosis	Crude rates of DALYs per 100,000 population	27.15814066
Sudden infant death syndrome	Crude rates of DALYs per 100,000 population	24.29059415
Other communicable, maternal, neonatal, and nutritional diseases	Crude rates of DALYs per 100,000 population	22.92164342
Maternal disorders	Crude rates of DALYs per 100,000 population	17.3131734
